# Supplementary material
Source: Springer Nature journal article supplement (https://www.springermedizin.de/resource/supplementary/40248_2014_200_MOESM2_ESM.pdf/9686204)

A

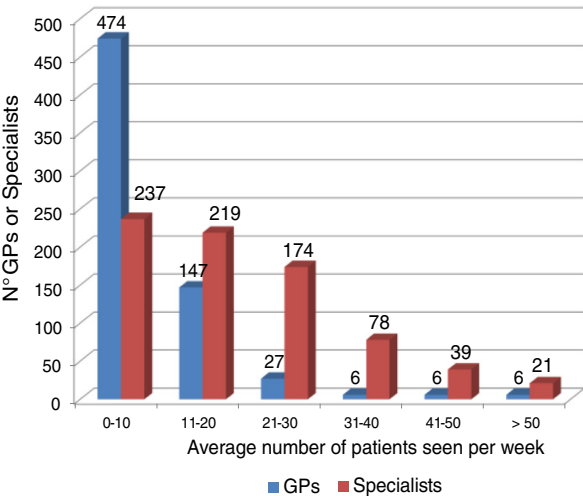

B

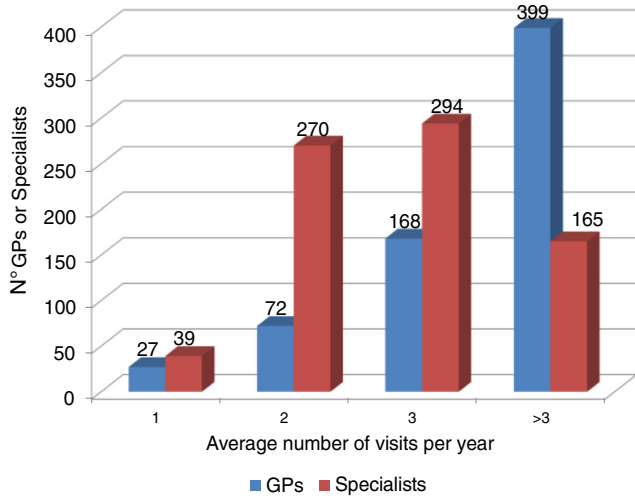

Supplement: MOESM2 [file 9686204]
